# Supplementary material for: MR-pheWAS with stratification and interaction: Searching for the causal effects of smoking heaviness identified an effect on facial aging
Source: PubMed Central journal article supplement (PMC6822717; doi:10.1371/journal.pgen.1008353), 2019-10-31
Supplement: pgen.1008353.s002.pdf [file pgen.1008353.s002.pdf]

| <b>Number of fields</b> | <b>Field IDs</b>                                                                                                            | <b>Reason excluded from phenome scan</b>                                 |
|-------------------------|-----------------------------------------------------------------------------------------------------------------------------|--------------------------------------------------------------------------|
| 1                       | 54                                                                                                                          | Assessment centre                                                        |
| 2                       | 87, 92                                                                                                                      | Polymorphic fields (containing values with mixed data types)             |
| 7                       | 5990, 22014, 22015, 22050, 23207, 23211, 23294, 23303, 24025, 110003                                                        | Not available at time of data download                                   |
| 17                      | 22000, 22001, 22003, 22004, 22005, 22006, 22009, 22010, 22011, 22012, 22013, 22018, 22019, 22021, 22027, 22051, 22052       | Genetic data description fields                                          |
| 1                       | 31                                                                                                                          | Sex field                                                                |
| 4                       | 34, 52, 21003, 21022                                                                                                        | Age fields                                                               |
| 17                      | 20012, 20013, 20014, 3059, 3065, 3081, 4268, 4275, 4281, 4287, 5149, 5152, 5155, 5164, 6024, 6074, 6075                     | Assessment centre environment (ACE) fields                               |
| 4                       | 22411, 22412, 22413, 22414                                                                                                  | Data processing indicators                                               |
| 21                      | 4232, 4243, 4259, 5090, 5091, 5136, 5138, 5139, 5140, 5141, 5142, 5143, 5144, 5145, 5146, 5147, 5148, 6312, 401, 402, 10691 | Categorical (single) field with more than one value recorded per person. |
