# Supplementary material for: MR-pheWAS with stratification and interaction: Searching for the causal effects of smoking heaviness identified an effect on facial aging
Source: PubMed Central journal article supplement (PMC6822717; doi:10.1371/journal.pgen.1008353), 2019-10-31
Supplement: pgen.1008353.s003.pdf [file pgen.1008353.s003.pdf]

| Rank                 | Field ID <sup>4</sup> | Interaction P value <sup>2</sup> | Association among ever smokers <sup>1</sup> | Association among never smokers <sup>1</sup> | Regression Type | Field description                                                 | Reference, baseline or ordinal categories <sup>3</sup>                |
|----------------------|-----------------------|----------------------------------|---------------------------------------------|----------------------------------------------|-----------------|-------------------------------------------------------------------|-----------------------------------------------------------------------|
| 1                    | 20150                 | 7.61e-12                         | -0.034 [-0.040, -0.027]                     | -0.004 [-0.009, 0.002]                       | LINEAR          | Forced expiratory volume in 1-second (FEV1), Best measure         | -                                                                     |
| 2                    | 20154                 | 4.49e-10                         | -0.067 [-0.083, -0.050]                     | -0.003 [-0.015, 0.007]                       | LINEAR          | Forced expiratory volume in 1-second (FEV1), predicted percentage | -                                                                     |
| 3                    | 3063                  | 1.06e-08                         | -0.029 [-0.035, -0.023]                     | -0.006 [-0.011, -0.001]                      | LINEAR          | Forced expiratory volume in 1-second (FEV1)                       | -                                                                     |
| 4                    | 1180                  | 1.92e-08                         | 0.039 [0.025, 0.054]                        | -0.017 [-0.031, -0.004]                      | ORDERED         | Morning/evening person (chronotype)                               | {Definitely a 'morning' person ...<br>Definitely an 'evening' person} |
| 5                    | 30030                 | 8.52e-08                         | 0.014 [0.007, 0.020]                        | -0.009 [-0.151, 0.004]                       | LINEAR          | Haematocrit percentage                                            | -                                                                     |
| 6                    | 30000                 | 2.60e-07                         | 0.021 [0.013, 0.028]                        | -0.007 [-0.014, 0.000]                       | LINEAR          | White blood cell (leukocyte) count                                | -                                                                     |
| 7                    | 30140                 | 9.67e-07                         | 0.021 [0.013, 0.029]                        | -0.005 [-0.012, 0.002]                       | LINEAR          | Neutrophil count                                                  | -                                                                     |
| 8                    | 30020                 | 2.29e-06                         | 0.013 [0.007, 0.020]                        | -0.007 [-0.012, -0.001]                      | LINEAR          | Haemoglobin concentration                                         | -                                                                     |
| Bonferroni threshold |                       |                                  |                                             |                                              |                 |                                                                   |                                                                       |
| 9                    | 22130                 | 3.52e-06                         | 0.271 [0.178, 0.364]                        | -0.248 [-0.450, -0.052]                      | BINARY          | Doctor diagnosed COPD (chronic obstructive pulmonary disease)     | No                                                                    |
| 10                   | 41204 value J439      | 3.54e-06                         | 0.342 [0.256, 0.427]                        | -0.350 [-0.635, -0.077]                      | BINARY          | Diagnoses - secondary ICD10: Emphysema, unspecified               | No                                                                    |
| 11                   | 40011 value 8071      | 5.70e-06                         | 0.369 [0.151, 0.584]                        | -0.558 [-0.904, -0.232]                      | BINARY          | Histology of cancer tumour: Squamous cell carcinoma, keratinizing | No                                                                    |
| 12                   | 1757                  | 7.71e-06                         | 0.060 [0.042, 0.078]                        | 0.004 [-0.012, 0.021]                        | ORDERED         | Facial ageing                                                     | { <i>Younger than you are ... Older than you are</i> }                |
