# Supplementary material for: MR-pheWAS with stratification and interaction: Searching for the causal effects of smoking heaviness identified an effect on facial aging
Source: PubMed Central journal article supplement (PMC6822717; doi:10.1371/journal.pgen.1008353), 2019-10-31
Supplement: pgen.1008353.s004.pdf [file pgen.1008353.s004.pdf]

| Rank | Field ID <sup>4</sup>  | P value <sup>2</sup> | PHEASANT Association in ever smokers <sup>1</sup> | PHEASANT Association in never smokers <sup>1</sup> | Regression Type in ever smokers <sup>5</sup> | Field description                                                                                                           | Reference, baseline or ordinal categories <sup>3</sup>             |
|------|------------------------|----------------------|---------------------------------------------------|----------------------------------------------------|----------------------------------------------|-----------------------------------------------------------------------------------------------------------------------------|--------------------------------------------------------------------|
| 1    | 2887                   | 1.08e-73             | 0.194 [0.173, 0.215]                              | EVER ONLY PHENO                                    | ORDERED                                      | Number of cigarettes previously smoked daily                                                                                | {3 quantity bands}                                                 |
| 2    | 20162                  | 4.13e-73             | 0.084 [0.075, 0.093]                              | EVER ONLY PHENO                                    | LINEAR                                       | Pack years adult smoking as proportion of life span exposed to smoking                                                      | -                                                                  |
| 3    | 20161                  | 4.04e-70             | 0.081 [0.072, 0.090]                              | EVER ONLY PHENO                                    | LINEAR                                       | Pack years of smoking                                                                                                       | -                                                                  |
| 4    | 1249                   | 8.00e-47             | -0.130 [-0.147, -0.112]                           | 0.019 [0.004,0.035]                                | ORDERED [BINARY]                             | Past tobacco smoking                                                                                                        | {Smoked on most or all days ... I have never smoked}               |
| 5    | 3456                   | 1.26e-27             | 0.206 [0.169, 0.244]                              | EVER ONLY PHENO                                    | ORDERED                                      | Number of cigarettes currently smoked daily (current cigarette smokers)                                                     | {3 quantity bands}                                                 |
| 6    | 20150                  | 6.65e-24             | -0.034 [-0.040, -0.027]                           | -0.004 [-0.009, 0.002]                             | LINEAR                                       | Forced expiratory volume in 1-second (FEV1), Best measure                                                                   | -                                                                  |
| 7    | 3476                   | 1.40e-22             | 0.180 [0.144, 0.216]                              | EVER ONLY PHENO                                    | ORDERED                                      | Difficulty not smoking for 1 day                                                                                            | {Very easy ... Very difficult}                                     |
| 8    | 3063                   | 2.02e-20             | -0.029 [-0.035, -0.023]                           | -0.006 [-0.011, -0.001]                            | LINEAR                                       | Forced expiratory volume in 1-second (FEV1)                                                                                 | -                                                                  |
| 9    | 20154                  | 2.91e-15             | -0.067 [-0.083, -0.050]                           | -0.004 [-0.015, 0.007]                             | LINEAR                                       | Forced expiratory volume in 1-second (FEV1), predicted percentage                                                           | -                                                                  |
| 10   | 41204 value J449       | 4.46e-15             | 0.172 [0.129, 0.216]                              | -0.023 [-0.129, 0.080]                             | BINARY                                       | Diagnoses - secondary ICD10: Chronic obstructive pulmonary disease, unspecified                                             | No                                                                 |
| 11   | 41204 value J439       | 5.62e-15             | 0.342 [0.256, 0.427]                              | -0.350 [-0.635, -0.077]                            | BINARY                                       | Diagnoses - secondary ICD10: Emphysema, unspecified                                                                         | No                                                                 |
| 12   | 3466                   | 4.03e-13             | -0.131 [-0.167, -0.096]                           | EVER ONLY PHENO                                    | ORDERED                                      | Time from waking to first cigarette                                                                                         | {Less than 5 minutes ... Longer than 2 hours}                      |
| 13   | 1757                   | 4.30e-11             | 0.060 [0.042, 0.078]                              | 0.004 [-0.012, 0.021]                              | ORDERED                                      | Facial ageing                                                                                                               | {Younger than you are ... older than you are}                      |
| 14   | 20151                  | 4.74e-10             | -0.020 [-0.026, -0.014]                           | -0.006 [-0.012, -0.001]                            | LINEAR                                       | Forced vital capacity (FVC), Best measure                                                                                   | -                                                                  |
| 15   | 6149 value 6           | 7.01e-10             | 0.060 [0.041, 0.079]                              | 0.020 [-0.002, 0.042]                              | BINARY                                       | Mouth/teeth dental problems: Dentures                                                                                       | No                                                                 |
| 16   | 22130                  | 1.08e-08             | 0.271 [0.178, 0.364]                              | -0.248 [-0.450, -0.052]                            | BINARY                                       | Doctor diagnosed COPD (chronic obstructive pulmonary disease)                                                               | No                                                                 |
| 17   | 20107 value 6          | 1.62e-08             | 0.071 [0.047, 0.096]                              | 0.057 [0.033, 0.080]                               | BINARY                                       | Illnesses of father: Chronic bronchitis/emphysema                                                                           | No                                                                 |
| 18   | 3062                   | 3.30e-08             | -0.017 [-0.023, -0.011]                           | -0.008 [-0.013, -0.003]                            | LINEAR                                       | Forced vital capacity (FVC)                                                                                                 | -                                                                  |
| 19   | 20111 value 6          | 5.28e-08             | 0.131 [0.084, 0.178]                              | 0.081 [0.029, 0.133]                               | BINARY                                       | Illnesses of siblings: Chronic bronchitis/emphysema                                                                         | No                                                                 |
| 20   | 30140                  | 7.39e-08             | 0.021 [0.013, 0.029]                              | -0.005 [-0.012, 0.002]                             | LINEAR                                       | Neutrophill count                                                                                                           | -                                                                  |
| 21   | 2926                   | 1.02e-07             | 0.054 [0.034, 0.074]                              | EVER ONLY PHENO                                    | ORDERED                                      | Number of unsuccessful stop-smoking attempts                                                                                | {3 quantity bands}                                                 |
| 22   | 1180                   | 1.14e-07             | 0.039 [0.025, 0.054]                              | -0.017 [-0.031, -0.004]                            | ORDERED                                      | Morning/evening person (chronotype)                                                                                         | {Definitely a 'morning' person ... Definitely an 'evening' person} |
| 23   | 30000                  | 1.31e-07             | 0.021 [0.013, 0.028]                              | -0.007 [-0.014, 0.000]                             | LINEAR                                       | White blood cell (leukocyte) count                                                                                          | -                                                                  |
| 24   | 1797                   | 3.35e-07             | -0.060 [-0.082, -0.037]                           | -0.059 [-0.078, -0.040]                            | BINARY                                       | Father still alive                                                                                                          | No                                                                 |
| 25   | 2644                   | 8.58e-07             | -0.105 [-0.147, -0.063]                           | -0.056 [-0.099, -0.012]                            | BINARY                                       | Light smokers, at least 100 smokes in lifetime                                                                              | No                                                                 |
| 26   | 6157 value 1           | 9.66e-07             | 0.079 [0.048, 0.111]                              | EVER ONLY PHENO                                    | BINARY                                       | Why stopped smoking: Illness or ill health                                                                                  | No                                                                 |
| 27   | 22507                  | 1.03e-06             | 0.042 [0.025, 0.059]                              | 0.009 [-0.071, 0.089]                              | LINEAR                                       | Age of stopping smoking                                                                                                     | -                                                                  |
| 28   | 20003 value 1141182628 | 1.05e-06             | 0.275 [0.164, 0.385]                              | -0.293 [-0.582, -0.015]                            | BINARY                                       | Treatment/medication code: tiotropium                                                                                       | No                                                                 |
| 29   | 20002 value 1113       | 1.20e-06             | 0.129 [0.077, 0.181]                              | -0.014 [-0.101, 0.072]                             | BINARY                                       | Non-cancer illness code, self-reported: emphysema/chronic bronchitis                                                        | No                                                                 |
| 30   | 20004 value 1104       | 1.40e-06             | 0.508 [0.300, 0.713]                              | -0.089 [-0.484, 0.286]                             | BINARY                                       | Operation code: aortic aneurysm/repair or stent                                                                             | No                                                                 |
| 31   | 6152 value 6           | 1.50e-06             | 0.117 [0.069, 0.164]                              | 0.018 [-0.059, 0.094]                              | BINARY                                       | Blood clot, DVT, bronchitis, emphysema, asthma, rhinitis, eczema, allergy diagnosed by doctor: Emphysema/chronic bronchitis | No                                                                 |

|                      |                    |          |                         |                         |             |                                                                                                           |                                |
|----------------------|--------------------|----------|-------------------------|-------------------------|-------------|-----------------------------------------------------------------------------------------------------------|--------------------------------|
| 32                   | 41202 value J441   | 2.39e-06 | 0.260 [0.152, 0.368]    | -0.052 [-0.471, 0.348]  | BINARY      | Diagnoses - main ICD10: Chronic obstructive pulmonary disease with acute exacerbation, unspecified        | No                             |
| Bonferroni threshold |                    |          |                         |                         |             |                                                                                                           |                                |
| 33                   | 2178               | 2.89e-06 | 0.035 [0.021, 0.050]    | 0.004 [-0.009, 0.018]   | ORDERED     | Overall health rating                                                                                     | {Excellent ... poor}           |
| 34                   | 2316               | 3.61e-06 | 0.042 [0.024, 0.059]    | 0.010 [-0.009, 0.029]   | BINARY      | Wheeze or whistling in the chest in last year                                                             | No                             |
| 35                   | 1807               | 3.75e-06 | -0.020 [-0.029, -0.012] | -0.020 [-0.028, -0.013] | LINEAR      | Father's age at death                                                                                     | -                              |
| 36                   | 41204 value Z720   | 5.07e-06 | 0.074 [0.042, 0.106]    | 0.020 [-0.140, 0.176]   | BINARY      | Diagnoses - secondary ICD10: tobacco use                                                                  | No                             |
| 37                   | 20002 value 1112   | 5.11e-06 | 0.215 [0.122, 0.307]    | -0.023 [-0.287, 0.233]  | BINARY      | Non-cancer illness code, self-reported: chronic obstructive airways disease/COPD                          | No                             |
| 38                   | 20107 value 3      | 5.48e-06 | 0.064 [0.036, 0.091]    | 0.075 [0.050, 0.100]    | BINARY      | Illnesses of father: Lung cancer                                                                          | No                             |
| 39                   | 40001 value C349   | 7.07e-06 | 0.225 [0.126, 0.323]    | 0.059 [-0.212, 0.323]   | BINARY      | Underlying (primary) cause of death: ICD10: Malignant neoplasm of bronchus and lung, unspecified          | No                             |
| 40                   | 41204 value J969   | 8.02e-06 | 0.222 [0.124, 0.319]    | 0.051 [-0.110, 0.210]   | BINARY      | Diagnoses - secondary ICD10: Respiratory failure, unspecified                                             | No                             |
| 41                   | 22508              | 8.03e-06 | 0.165 [0.093, 0.237]    | <i>EVER ONLY PHENO</i>  | LINEAR      | Amount of tobacco currently smoked                                                                        | -                              |
| 42                   | 3064               | 1.21e-05 | -0.015 [-0.022, -0.008] | -0.003 [-0.009, 0.002]  | LINEAR      | Peak expiratory flow (PEF)                                                                                | -                              |
| 43                   | 41204 value A419   | 1.37e-05 | 0.228 [0.125, 0.330]    | -0.040 [-0.167, 0.085]  | BINARY      | Diagnoses - secondary ICD10: Septicaemia, unspecified                                                     | No                             |
| 44                   | 2907               | 1.76e-05 | -0.046 [-0.067, -0.025] | <i>EVER ONLY PHENO</i>  | BINARY      | Ever stopped smoking for 6+ months                                                                        | No                             |
| 45                   | 30040              | 1.89e-05 | 0.017 [0.009, 0.024]    | 0.008 [0.001, 0.015]    | LINEAR      | Mean corpuscular volume                                                                                   | -                              |
| 46                   | 41202 value J440   | 2.38e-05 | 0.205 [0.110, 0.300]    | -0.194 [-0.573, 0.166]  | BINARY      | Diagnoses - main ICD10: Chronic obstructive pulmonary disease with acute lower respiratory infection      | No                             |
| 47                   | 30030              | 2.41e-05 | 0.014 [0.007, 0.020]    | -0.009 [-0.015, -0.004] | LINEAR      | Haematocrit percentage                                                                                    | -                              |
| 48                   | 30020              | 3.16e-5  | 0.013 [0.007, 0.020]    | -0.007 [-0.012, -0.001] | LINEAR      | Haemoglobin concentration                                                                                 | -                              |
| 49                   | 3088               | 3.94e-05 | 0.054 [0.028, 0.080]    | 0.006 [-0.021, 0.033]   | ORDERED     | Contra-indications for spirometry                                                                         | {No ... Yes}                   |
| 50                   | 41204 value J440   | 4.25e-05 | 0.200 [0.104, 0.295]    | 0.064 [-0.248, 0.365]   | BINARY      | Diagnoses - secondary ICD10: Chronic obstructive pulmonary disease with acute lower respiratory infection | No                             |
| 51                   | 1359               | 4.47e-05 | -0.030 [-0.044, -0.015] | -0.012 [-0.025, 0.001]  | ORDERED     | Poultry intake                                                                                            | {Never ... Once or more daily} |
| 52                   | 20110 value 3      | 4.88e-05 | 0.082 [0.043, 0.122]    | 0.090 [0.054, 0.126]    | BINARY      | Illnesses of mother: Lung cancer                                                                          | No                             |
| 53                   | 41210 value Z245   | 4.89e-05 | 0.200 [0.103, 0.296]    | -0.138 [-0.287, 0.008]  | BINARY      | Operative procedures - secondary OPCS: Bronchus                                                           | No                             |
| 54                   | 1448 (reference 3) | 6.44e-05 | -                       | -                       | MULTINOMIAL | Bread type                                                                                                | Wholemeal or wholegrain        |
| 55                   | 41204 value K703   | 6.87e-05 | 0.455 [0.230, 0.678]    | -0.049 [-0.393, 0.281]  | BINARY      | Diagnoses - secondary ICD10: Alcoholic cirrhosis of liver                                                 | No                             |
| 56                   | 41200 value L541   | 7.02e-05 | 0.358 [0.181, 0.534]    | -                       | BINARY      | Operative procedures - main OPCS: Percutaneous transluminal angioplasty of iliac artery                   | No                             |
| 57                   | 41202 value C341   | 8.74e-05 | 0.246 [0.123, 0.368]    | 0.132 [-0.175, 0.431]   | BINARY      | Diagnoses - main ICD10: Malignant neoplasm of bronchus and lung, Upper lobe, bronchus or lung             | No                             |
| 58                   | 1518               | 9.20e-05 | 0.032 [0.016, 0.048]    | -0.000 [-0.015, 0.014]  | ORDERED     | Hot drink temperature                                                                                     | {Very hot ... warm}            |
| 59                   | 30070              | 9.44e-05 | 0.015 [0.008, 0.023]    | -0.001 [-0.008, 0.005]  | LINEAR      | Red blood cell (erythrocyte) distribution width                                                           | -                              |
| 60                   | 41202 value I739   | 1.04e-04 | 0.255 [0.125, 0.383]    | -0.034 [-0.360, 0.281]  | BINARY      | Diagnoses - main ICD10: Peripheral vascular disease, unspecified                                          | No                             |
| 61                   | 41202 value C621   | 1.13e-04 | 1.711 [0.886, 2.652]    | 0.871 [0.100, 1.658]    | BINARY      | Diagnoses - main ICD10: Descended testis                                                                  | No                             |
| 62                   | 41200 value L544   | 1.24e-04 | 0.443 [0.215, 0.669]    | -                       | BINARY      | Operative procedures - main OPCS: Percutaneous transluminal insertion of stent into iliac artery          | No                             |
| 63                   | 41202 value C349   | 1.40e-04 | 0.208 [0.100, 0.314]    | 0.063 [-0.173, 0.294]   | BINARY      | Diagnoses - main ICD10: Malignant neoplasm of bronchus and lung, Bronchus or lung, unspecified            | No                             |

|    |                  |          |                      |                        |        |                                                                       |    |
|----|------------------|----------|----------------------|------------------------|--------|-----------------------------------------------------------------------|----|
| 64 | 41204 value I972 | 1.46e-04 | 1.242 [0.613, 1.906] | -0.063 [-0.684, 0.516] | BINARY | Diagnoses - secondary ICD10: Postmastectomy lymphoedema syndrome      | No |
| 65 | 2897             | 1.53e-04 | 0.019 [0.009, 0.029] | <i>EVER ONLY PHENO</i> | LINEAR | Age stopped smoking                                                   | -  |
| 66 | 20004 value I129 | 1.57e-04 | 0.167 [0.080, 0.253] | 0.062 [-0.039, 0.162]  | BINARY | Operation code: throat/larynx surgery (incl tracheostomy)             | No |
| 67 | 41204 value F220 | 1.59e-04 | 0.827 [0.398, 1.259] | -0.031 [-0.558, 0.466] | BINARY | Diagnoses - secondary ICD10: Delusional disorder                      | No |
| 68 | 6157 value 2     | 1.65e-04 | 0.077 [0.037, 0.117] | <i>EVER ONLY PHENO</i> | BINARY | Why stopped smoking: Doctor's advice                                  | No |
| 69 | 41204 value I739 | 1.80e-04 | 0.150 [0.071, 0.228] | -0.014 [-0.179, 0.147] | BINARY | Diagnoses - secondary ICD10: Peripheral vascular disease, unspecified | No |
