# Supplementary material for: MR-pheWAS with stratification and interaction: Searching for the causal effects of smoking heaviness identified an effect on facial aging
Source: PubMed Central journal article supplement (PMC6822717; doi:10.1371/journal.pgen.1008353), 2019-10-31
Supplement: pgen.1008353.s005.pdf [file pgen.1008353.s005.pdf]

| Rank                 | Field ID <sup>4</sup> | P value  | Association among never smokers <sup>1</sup> | Association among ever smokers <sup>1</sup> | Regression Type | Field description                                 | Reference, baseline or ordinal categories <sup>3</sup> |
|----------------------|-----------------------|----------|----------------------------------------------|---------------------------------------------|-----------------|---------------------------------------------------|--------------------------------------------------------|
| 1                    | 1797                  | 7.05e-10 | -0.059 [-0.078, -0.040]                      | -0.060 [-0.082, -0.037]                     | LOGISTIC-BINARY | Father still alive                                | No                                                     |
| 2                    | 20107 value 3         | 7.70e-09 | 0.075 [0.050, 0.100]                         | 0.064 [0.036, 0.091]                        | LOGISTIC-BINARY | Illnesses of father: Lung cancer                  | No                                                     |
| 3                    | 20110 value 6         | 7.94e-09 | 0.090 [0.059, 0.121]                         | 0.050 [0.017, 0.083]                        | LOGISTIC-BINARY | Illnesses of mother: Chronic bronchitis/emphysema | No                                                     |
| 4                    | 1807                  | 4.67e-07 | -0.020 [-0.028, -0.013]                      | -0.020 [-0.029, -0.012]                     | LINEAR          | Father's age at death                             | -                                                      |
| 5                    | 1835                  | 6.56e-07 | -0.042 [-0.058, -0.025]                      | -0.014 [-0.033, 0.005]                      | LOGISTIC-BINARY | Mother still alive                                | No                                                     |
| 6                    | 20110 value 3         | 9.09e-07 | 0.090 [0.054, 0.126]                         | 0.082 [0.043, 0.122]                        | LOGISTIC-BINARY | Illnesses of mother: Lung cancer                  | No                                                     |
| 7                    | 20107 value 6         | 3.12e-06 | 0.057 [0.033, 0.080]                         | 0.071 [0.047, 0.096]                        | LOGISTIC-BINARY | Illnesses of father: Chronic bronchitis/emphysema | No                                                     |
| 8                    | 30010                 | 8.88e-06 | -0.013 [-0.019, -0.007]                      | 0.005 [-0.002, 0.012]                       | LINEAR          | Red blood cell (erythrocyte) count                | -                                                      |
| Bonferroni Threshold |                       |          |                                              |                                             |                 |                                                   |                                                        |
