# Supplementary material for: MR-pheWAS with stratification and interaction: Searching for the causal effects of smoking heaviness identified an effect on facial aging
Source: PubMed Central journal article supplement (PMC6822717; doi:10.1371/journal.pgen.1008353), 2019-10-31
Supplement: pgen.1008353.s006.pdf [file pgen.1008353.s006.pdf]

| Rank                 | Field ID <sup>4</sup> | P value  | Association among whole sample | Association among ever smokers <sup>1</sup> | Association among never smokers <sup>1</sup> | Regression Type  | Field description                                                               | Reference, baseline or ordinal categories <sup>3</sup> |
|----------------------|-----------------------|----------|--------------------------------|---------------------------------------------|----------------------------------------------|------------------|---------------------------------------------------------------------------------|--------------------------------------------------------|
| 1                    | 2887                  | 7.25e-74 | 0.194 [0.173, 0.215]           | 0.194 [0.173, 0.215]                        | <i>EVER ONLY PHENO</i>                       | ORDERED-LOGISTIC | Number of cigarettes previously smoked daily                                    | {3 quantity bands}                                     |
| 2                    | 20162                 | 3.59e-73 | 0.084 [0.075, 0.093]           | 0.084 [0.075, 0.093]                        | <i>EVER ONLY PHENO</i>                       | LINEAR           | Pack years adult smoking as proportion of life span exposed to smoking          | -                                                      |
| 3                    | 20161                 | 3.59e-70 | 0.081 [0.072, 0.090]           | 0.081 [0.072, 0.090]                        | <i>EVER ONLY PHENO</i>                       | LINEAR           | Pack years of smoking                                                           | -                                                      |
| 4                    | 3456                  | 1.26e-27 | 0.206 [0.169, 0.244]           | 0.206 [0.169, 0.244]                        | <i>EVER ONLY PHENO</i>                       | ORDERED-LOGISTIC | Number of cigarettes currently smoked daily (current cigarette smokers)         | {3 quantity bands}                                     |
| 5                    | 2644                  | 2.54e-26 | -0.108 [-0.128, -0.088]        | -0.105 [-0.147, -0.063]                     | -0.056 [-0.099, -0.012]                      | LOGISTIC-BINARY  | "Light smokers at least 100 smokes in lifetime"                                 | No                                                     |
| 6                    | 3476                  | 1.40e-22 | 0.180 [0.144, 0.216]           | 0.180 [0.144, 0.216]                        | <i>EVER ONLY PHENO</i>                       | ORDERED-LOGISTIC | Difficulty not smoking for 1 day                                                | {Very easy ... Very difficult}                         |
| 7                    | 1797                  | 2.09e-15 | -0.059 [-0.073, -0.044]        | -0.060 [-0.082, -0.037]                     | -0.059 [-0.078, -0.040]                      | LOGISTIC-BINARY  | Father still alive                                                              | No                                                     |
| 8                    | 3063                  | 3.28e-14 | -0.015 [-0.019, -0.011]        | -0.029 [-0.035, -0.023]                     | -0.006 [-0.011, -0.001]                      | LINEAR           | Forced expiratory volume in 1-second (FEV1)                                     | -                                                      |
| 9                    | 20150                 | 4.28e-14 | -0.016 [-0.021, -0.012]        | -0.034 [-0.040, -0.027]                     | -0.004 [-0.009, 0.002]                       | LINEAR           | "Forced expiratory volume in 1-second (FEV1) Best measure"                      | -                                                      |
| 10                   | 3466                  | 4.03e-13 | -0.131 [-0.167, -0.096]        | -0.131 [-0.167, -0.096]                     | <i>EVER ONLY PHENO</i>                       | ORDERED-LOGISTIC | Time from waking to first cigarette                                             | {Less than 5 minutes ... Longer than 2 hours}          |
| 11                   | 20107 value 3         | 4.67e-13 | 0.069 [0.050, 0.088]           | 0.064 [0.036, 0.091]                        | 0.075 [0.050, 0.100]                         | LOGISTIC-BINARY  | Illnesses of father: Lung cancer                                                | No                                                     |
| 12                   | 20107 value 6         | 7.52e-13 | 0.063 [0.045, 0.080]           | 0.071 [0.047, 0.096]                        | 0.057 [0.033, 0.080]                         | LOGISTIC-BINARY  | Illnesses of father: Chronic bronchitis/emphysema                               | No                                                     |
| 13                   | 20154                 | 1.20e-11 | -0.031 [-0.040, -0.022]        | -0.067 [-0.083, -0.050]                     | -0.004 [-0.015, 0.007]                       | LINEAR           | Forced expiratory volume in 1-second (FEV1) predicted percentage                | -                                                      |
| 14                   | 1807                  | 2.25e-11 | -0.020 [-0.026, -0.014]        | -0.020 [-0.029, -0.012]                     | -0.020 [-0.028, -0.013]                      | LINEAR           | Father's age at death                                                           | -                                                      |
| 15                   | 41204 value J449      | 9.17e-11 | 0.130 [0.091, 0.169]           | 0.172 [0.129, 0.216]                        | -0.023 [-0.129, 0.080]                       | LOGISTIC-BINARY  | Diagnoses - secondary ICD10: Chronic obstructive pulmonary disease, unspecified | No                                                     |
| 16                   | 20110 value 3         | 1.82e-10 | 0.087 [0.060, 0.113]           | 0.082 [0.043, 0.122]                        | 0.090 [0.054, 0.126]                         | LOGISTIC-BINARY  | Illnesses of mother: Lung cancer                                                | No                                                     |
| 17                   | 41204 value J439      | 1.84e-10 | 0.264 [0.182, 0.345]           | 0.342 [0.256, 0.427]                        | -0.350 [-0.635, -0.077]                      | LOGISTIC-BINARY  | Diagnoses - secondary ICD10: Emphysema, unspecified                             | No                                                     |
| 18                   | 20110 value 6         | 3.98e-10 | 0.072 [0.049, 0.094]           | 0.050 [0.017, 0.083]                        | 0.090 [0.059, 0.121]                         | LOGISTIC-BINARY  | Illnesses of mother: Chronic bronchitis/emphysema                               | No                                                     |
| 19                   | 20111 value 6         | 2.51e-09 | 0.106 [0.071, 0.141]           | 0.131 [0.084, 0.178]                        | 0.081 [0.029, 0.133]                         | LOGISTIC-BINARY  | Illnesses of siblings: Chronic bronchitis/emphysema                             | No                                                     |
| 20                   | 3062                  | 7.68e-09 | -0.011 [-0.015, -0.007]        | -0.017 [-0.023, -0.011]                     | -0.008 [-0.013, -0.003]                      | LINEAR           | Forced vital capacity (FVC)                                                     | -                                                      |
| 21                   | 20151                 | 1.36e-08 | -0.012 [-0.016, -0.008]        | -0.020 [-0.026, -0.014]                     | -0.006 [-0.012, -0.001]                      | LINEAR           | Forced vital capacity (FVC) Best measure                                        | -                                                      |
| 22                   | 6149 value 6          | 8.41e-08 | 0.039 [0.025, 0.053]           | 0.060 [0.041, 0.079]                        | 0.020 [-0.002, 0.042]                        | LOGISTIC-BINARY  | Mouth/teeth dental problems: Dentures                                           | No                                                     |
| 23                   | 2926                  | 9.52e-08 | 0.054 [0.034, 0.074]           | 0.054 [0.034, 0.074]                        | <i>EVER ONLY PHENO</i>                       | ORDERED-LOGISTIC | Number of unsuccessful stop-smoking attempts                                    | {3 quantity bands}                                     |
| 24                   | 22507                 | 3.65e-07 | 0.043 [0.026, 0.059]           | 0.042 [0.025, 0.059]                        | 0.009 [-0.071, 0.089]                        | LINEAR           | Age of stopping smoking                                                         | -                                                      |
| 25                   | 6157 value 1          | 8.09e-07 | 0.080 [0.048, 0.112]           | 0.079 [0.048, 0.111]                        | <i>EVER ONLY PHENO</i>                       | LOGISTIC-BINARY  | Why stopped smoking: Illness or ill health                                      | No                                                     |
| 26                   | 1757                  | 1.53e-06 | 0.030 [0.018, 0.042]           | 0.060 [0.042, 0.078]                        | 0.004 [-0.012, 0.021]                        | ORDERED-LOGISTIC | Facial ageing                                                                   | {Younger than you are ... Older than you are}          |
| Bonferroni Threshold |                       |          |                                |                                             |                                              |                  |                                                                                 |                                                        |
| 28                   | 30050                 | 2.67e-06 | 0.012 [0.007, 0.017]           | 0.014 [0.006, 0.022]                        | 0.012 [0.005, 0.019]                         | LINEAR           | Mean corpuscular haemoglobin                                                    | -                                                      |
| 27                   | 1835                  | 2.69e-06 | -0.030 [-0.042, -0.017]        | -0.014 [-0.033, 0.005]                      | -0.042 [-0.058, -0.025]                      | LOGISTIC-BINARY  | Mother still alive                                                              | No                                                     |
| 29                   | 20004 value 1491      | 2.93e-06 | 0.104 [0.060, 0.148]           | 0.120 [0.053, 0.187]                        | 0.090 [0.032, 0.148]                         | LOGISTIC-BINARY  | Operation code: squint correction                                               | No                                                     |
| 30                   | 22508                 | 8.34e-06 | 0.164 [0.092, 0.236]           | 0.165 [0.093, 0.237]                        | <i>EVER ONLY PHENO</i>                       | LINEAR           | Amount of tobacco currently smoked                                              | -                                                      |
| 31                   | 41202 value C621      | 1.20e-05 | 1.259 [0.706, 1.841]           | 1.711 [0.886, 2.652]                        | 0.871 [0.100, 1.658]                         | LOGISTIC-BINARY  | Diagnoses - main ICD10: Descended testis                                        | No                                                     |
| 32                   | 30040                 | 1.21e-05 | 0.011 [0.006, 0.017]           | 0.017 [0.009, 0.024]                        | 0.008 [0.001, 0.015]                         | LINEAR           | Mean corpuscular volume                                                         | -                                                      |
| 33                   | 2907                  | 1.84e-05 | -0.046 [-0.067, -0.025]        | -0.046 [-0.067, -0.025]                     | <i>EVER ONLY PHENO</i>                       | LOGISTIC-BINARY  | Ever stopped smoking for 6+ months                                              | No                                                     |

|    |                  |          |                         |                         |                         |                  |                                                                                                                             |                                |
|----|------------------|----------|-------------------------|-------------------------|-------------------------|------------------|-----------------------------------------------------------------------------------------------------------------------------|--------------------------------|
| 34 | 41202 value J441 | 2.45e-05 | 0.223 [0.119, 0.326]    | 0.260 [0.152, 0.368]    | -0.052 [-0.471, 0.348]  | LOGISTIC-BINARY  | Diagnoses - main ICD10: Chronic obstructive pulmonary disease with acute exacerbation, unspecified                          | No                             |
| 35 | 20160            | 2.98e-05 | -0.022 [-0.033, -0.012] | -                       | -0.019 [-0.035, -0.004] | LOGISTIC-BINARY  | Ever smoked                                                                                                                 | No                             |
| 36 | 25062            | 3.09e-05 | 0.063 [0.033, 0.092]    | 0.081 [0.033, 0.128]    | 0.050 [0.012, 0.087]    | LINEAR           | Mean FA in corticospinal tract on FA skeleton (right)                                                                       | -                              |
| 37 | 40001 value C349 | 3.20e-05 | 0.195 [0.103, 0.286]    | 0.225 [0.126, 0.323]    | 0.059 [-0.212, 0.323]   | LOGISTIC-BINARY  | Underlying (primary) cause of death: ICD10: Malignant neoplasm of bronchus and lung, unspecified                            | No                             |
| 38 | 25356            | 3.99e-05 | 0.062 [0.032, 0.091]    | 0.089 [0.041, 0.136]    | 0.044 [0.007, 0.082]    | LINEAR           | Mean ICVF in superior cerebellar peduncle on FA skeleton (right)                                                            | -                              |
| 39 | 41204 value N130 | 4.41e-05 | 1.220 [0.645, 1.823]    | 1.291 [0.441, 2.210]    | 1.177 [0.395, 2.008]    | LOGISTIC-BINARY  | Diagnoses - secondary ICD10: Hydronephrosis with ureteropelvic junction obstruction                                         | No                             |
| 40 | 1359             | 4.57e-05 | -0.020 [-0.030, -0.010] | -0.030 [-0.044, -0.015] | -0.012 [-0.025, 0.001]  | ORDERED-LOGISTIC | Poultry intake                                                                                                              | {Never ... Once or more daily} |
| 41 | 41200 value L541 | 4.88e-05 | 0.359 [0.185, 0.531]    | 0.358 [0.181, 0.534]    | -                       | LOGISTIC-BINARY  | Operative procedures - main OPCS: Percutaneous transluminal angioplasty of iliac artery                                     | No                             |
| 42 | 5096             | 7.54e-05 | -0.022 [-0.033, -0.011] | -0.021 [-0.037, -0.004] | -0.022 [-0.037, -0.008] | LINEAR           | 3mm weak meridian (left)                                                                                                    | -                              |
| 43 | 6152 value 6     | 8.50e-05 | 0.080 [0.040, 0.120]    | 0.117 [0.069, 0.164]    | 0.018 [-0.059, 0.094]   | LOGISTIC-BINARY  | Blood clot, DVT, bronchitis, emphysema, asthma, rhinitis, eczema, allergy diagnosed by doctor: Emphysema/chronic bronchitis |                                |
| 44 | 41210 value Z863 | 8.51e-05 | 0.273 [0.136, 0.409]    | 0.288 [0.080, 0.492]    | 0.258 [0.074, 0.440]    | LOGISTIC-BINARY  | Operative procedures - secondary OPCS: Tarsometatarsal joint                                                                | No                             |
| 45 | 41204 value Z720 | 9.03e-05 | 0.061 [0.031, 0.092]    | 0.074 [0.042, 0.106]    | 0.020 [-0.140, 0.176]   | LOGISTIC-BINARY  | Diagnoses - secondary ICD10: tobacco use                                                                                    | No                             |
| 46 | 5098             | 9.79e-05 | -0.023 [-0.035, -0.012] | -0.018 [-0.036, -0.001] | -0.027 [-0.042, -0.011] | LINEAR           | 6mm weak meridian (right)                                                                                                   | -                              |
| 47 | 20004 value 1104 | 9.94e-05 | 0.358 [0.177, 0.537]    | 0.508 [0.300, 0.713]    | -0.089 [-0.484, 0.286]  | LOGISTIC-BINARY  | Operation code: aortic aneurysm/repair or stent                                                                             | No                             |
| 48 | 25261            | 1.00e-04 | -0.113 [-0.170, -0.056] | -0.164 [-0.256, -0.073] | -0.079 [-0.151, -0.006] | ORDERED-LOGISTIC | Mean L2 in superior cerebellar peduncle on FA skeleton (left)                                                               | -                              |
