# Supplementary material for: MR-pheWAS with stratification and interaction: Searching for the causal effects of smoking heaviness identified an effect on facial aging
Source: PubMed Central journal article supplement (PMC6822717; doi:10.1371/journal.pgen.1008353), 2019-10-31
Supplement: pgen.1008353.s007.pdf [file pgen.1008353.s007.pdf]

| Rank                 | Field ID <sup>4</sup> | Interaction P value <sup>2</sup> | Association among ever smokers <sup>1</sup> | Association among never smokers <sup>1</sup> | Regression Type | Field description                                                               | Reference, baseline or ordinal categories <sup>3</sup> |
|----------------------|-----------------------|----------------------------------|---------------------------------------------|----------------------------------------------|-----------------|---------------------------------------------------------------------------------|--------------------------------------------------------|
| 1                    | 20150                 | 7.61e-12                         | -0.034 [-0.040, -0.027]                     | -0.004 [-0.009, 0.002]                       | LINEAR          | Forced expiratory volume in 1-second (FEV1), Best measure                       | -                                                      |
| 2                    | 20154                 | 4.49e-10                         | -0.067 [-0.083, -0.050]                     | -0.004 [-0.015, 0.007]                       | LINEAR          | Forced expiratory volume in 1-second (FEV1), predicted percentage               | -                                                      |
| 3                    | 3063                  | 1.06e-08                         | -0.029 [-0.035, -0.023]                     | -0.006 [-0.011, -0.001]                      | LINEAR          | Forced expiratory volume in 1-second (FEV1)                                     | -                                                      |
| 4                    | 41204 value J439      | 3.54e-06                         | 0.342 [0.256, 0.427]                        | -0.350 [-0.635, -0.077]                      | BINARY          | Diagnoses - secondary ICD10: Emphysema, unspecified                             | No                                                     |
| 5                    | 1757                  | 7.71e-06                         | 0.060 [0.042, 0.078]                        | 0.004 [-0.012, 0.021]                        | ORDERED         | Facial ageing                                                                   | <i>{Younger than you are ... Older than you are}</i>   |
| 6                    | 41204 value J449      | 6.76e-04                         | 0.172 [0.129, 0.216]                        | -0.023 [-0.129, -0.080]                      | BINARY          | Diagnoses - secondary ICD10: Chronic obstructive pulmonary disease, unspecified | No                                                     |
| Bonferroni threshold |                       |                                  |                                             |                                              |                 |                                                                                 |                                                        |
| 7                    | 20151                 | 1.23e-03                         | -0.020 [-0.026, -0.014]                     | -0.006 [-0.012, -0.001]                      | LINEAR          | Forced vital capacity (FVC), Best measure                                       | -                                                      |
| 8                    | 6149 value 6          | 6.71e-03                         | 0.060 [0.041, 0.079]                        | 0.020 [-0.002, 0.042]                        | BINARY          | Mouth/teeth dental problems: Dentures                                           | No                                                     |
| 9                    | 20004 value 1104      | 7.41e-03                         | 0.508 [0.300, 0.713]                        | -0.089 [-0.484, 0.286]                       | BINARY          | Operation code: aortic aneurysm/repair or stent                                 | No                                                     |
