# Supplementary material for: MR-pheWAS with stratification and interaction: Searching for the causal effects of smoking heaviness identified an effect on facial aging
Source: PubMed Central journal article supplement (PMC6822717; doi:10.1371/journal.pgen.1008353), 2019-10-31

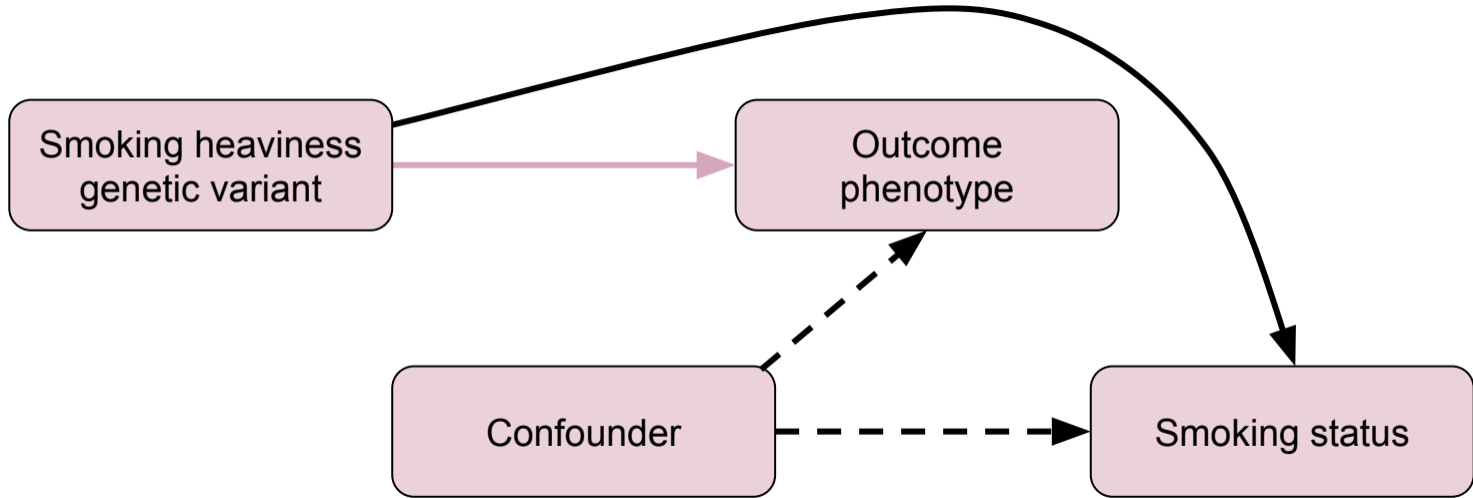

Supplement: pgen.1008353.s009.pdf [file pgen.1008353.s009.pdf]
