# Supplementary material for: MR-pheWAS with stratification and interaction: Searching for the causal effects of smoking heaviness identified an effect on facial aging
Source: PubMed Central journal article supplement (PMC6822717; doi:10.1371/journal.pgen.1008353), 2019-10-31

a)  $OR_{\text{conf,si}} = 10$ , positive effect of confounder on outcome

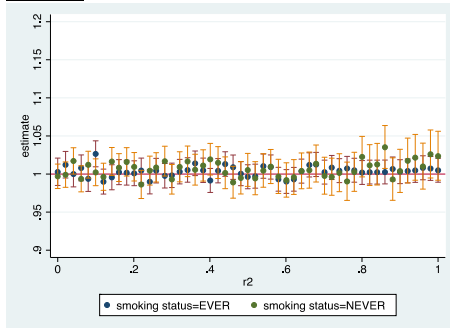

b)  $OR_{\text{conf,si}} = 20$ , positive effect of confounder on outcome

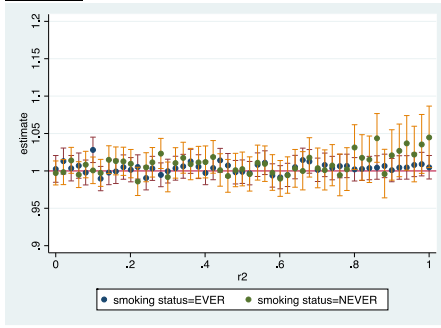

c)  $OR_{\text{conf,si}} = 50$ , positive effect of confounder on outcome

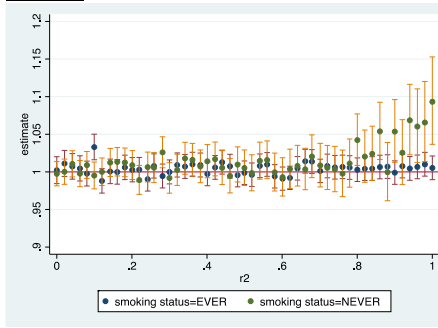

d)  $OR_{\text{conf,si}} = 100$ , positive effect of confounder on outcome

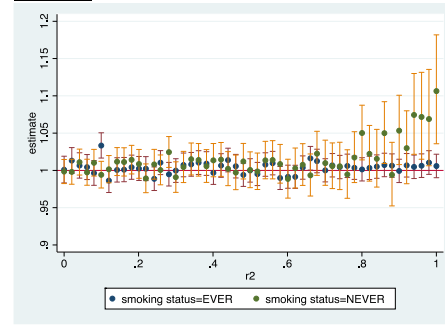

e)  $OR_{\text{conf,si}} = 10$ , negative effect of confounder on outcome

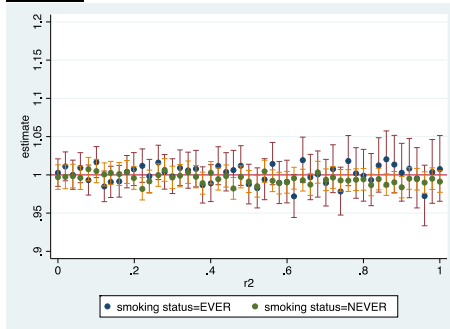

f)  $OR_{\text{conf,si}} = 20$ , negative effect of confounder on outcome

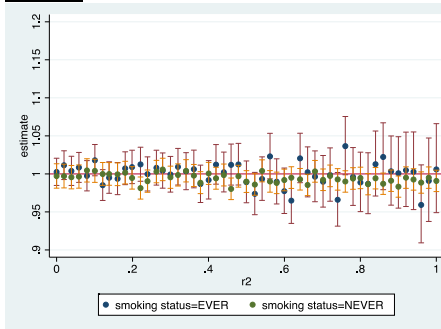

g)  $OR_{\text{conf,si}} = 50$ , negative effect of confounder on outcome

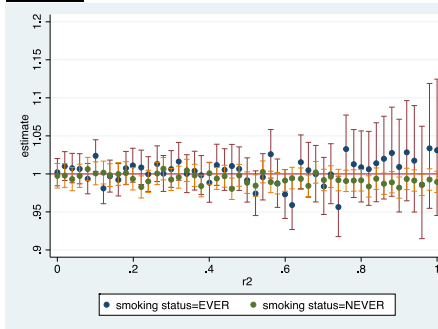

h)  $OR_{\text{conf,si}} = 100$ , negative effect of confounder on outcome

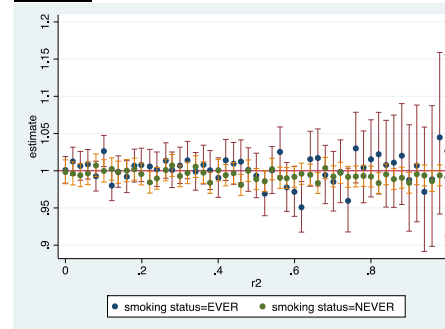

Supplement: pgen.1008353.s010.pdf [file pgen.1008353.s010.pdf]
