# Supplementary material for: MR-pheWAS with stratification and interaction: Searching for the causal effects of smoking heaviness identified an effect on facial aging
Source: PubMed Central journal article supplement (PMC6822717; doi:10.1371/journal.pgen.1008353), 2019-10-31

**a)  $OR_{conf,si} = 10$ , positive effect of confounder on outcome**

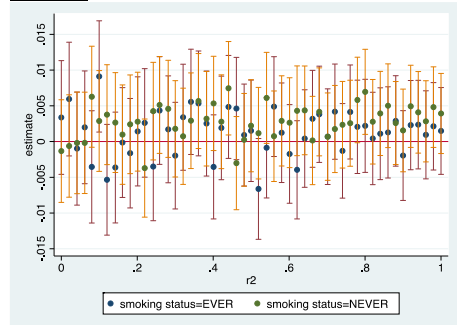

**b)  $OR_{conf,si} = 20$ , positive effect of confounder on outcome**

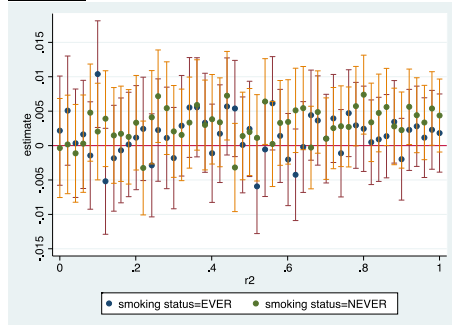

**c)  $OR_{conf,si} = 50$ , positive effect of confounder on outcome**

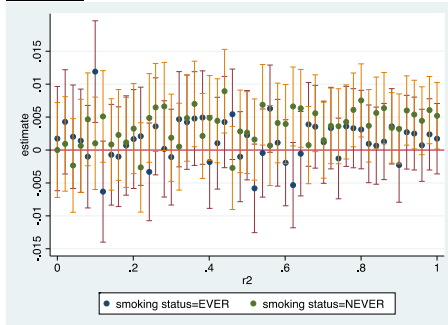

**d)  $OR_{conf,si} = 100$ , positive effect of confounder on outcome**

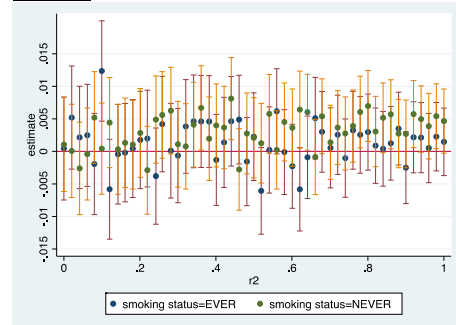

**e)  $OR_{conf,si} = 10$ , negative effect of confounder on outcome**

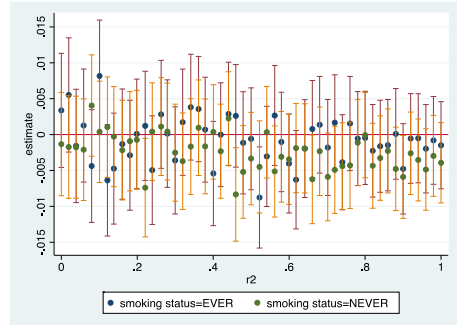

**f)  $OR_{conf,si} = 20$ , negative effect of confounder on outcome**

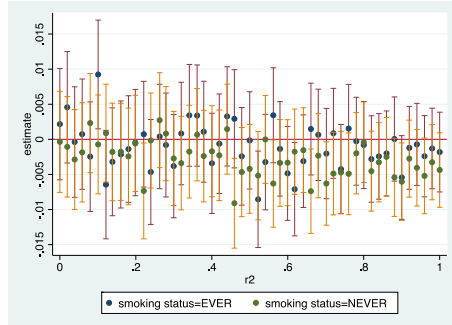

**g)  $OR_{conf,si} = 50$ , negative effect of confounder on outcome**

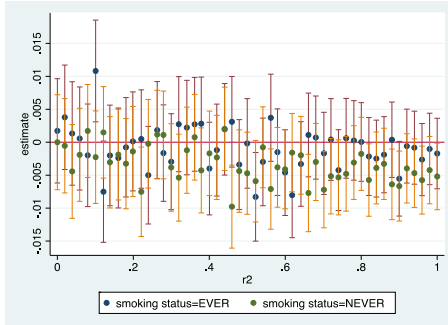

**h)  $OR_{conf,si} = 100$ , negative effect of confounder on outcome**

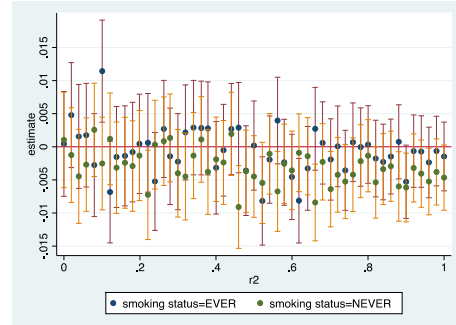

Supplement: pgen.1008353.s011.pdf [file pgen.1008353.s011.pdf]
