# Supplementary material for: MR-pheWAS with stratification and interaction: Searching for the causal effects of smoking heaviness identified an effect on facial aging
Source: PubMed Central journal article supplement (PMC6822717; doi:10.1371/journal.pgen.1008353), 2019-10-31

**a) Categorical facial aging outcome, positive effect of confounder on outcome**

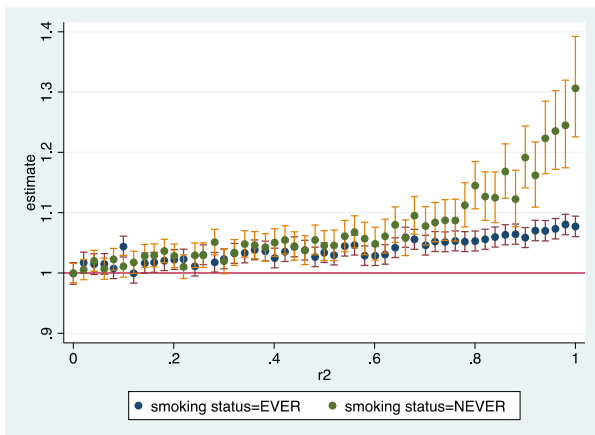

**b) Continuous outcome, positive effect of confounder on outcome**

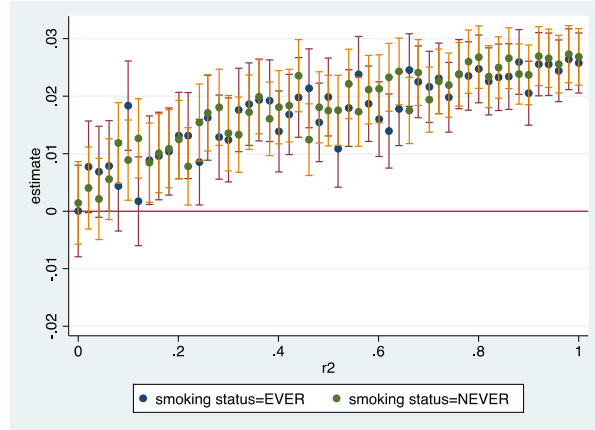

**c) Categorical facial aging outcome, negative effect of confounder on outcome**

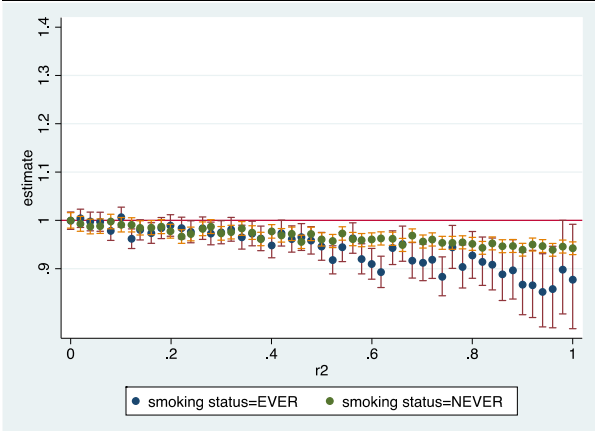

**d) Continuous outcome, negative effect of confounder on outcome**

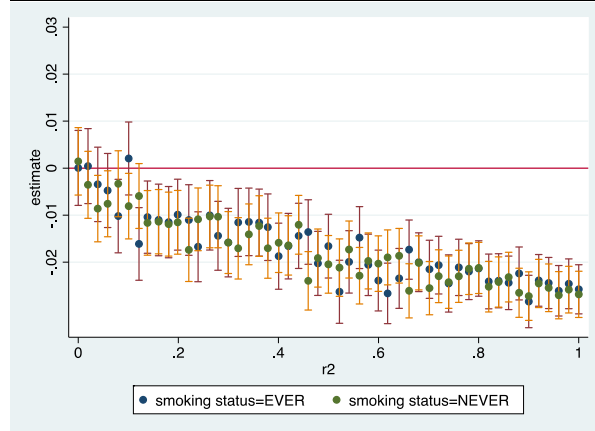

Supplement: pgen.1008353.s012.pdf [file pgen.1008353.s012.pdf]
