# Supplementary material for: MR-pheWAS with stratification and interaction: Searching for the causal effects of smoking heaviness identified an effect on facial aging
Source: PubMed Central journal article supplement (PMC6822717; doi:10.1371/journal.pgen.1008353), 2019-10-31

a) Effect of snp on outcome is at least partially via smoking heaviness - different SNP effects expected in smoking status strata

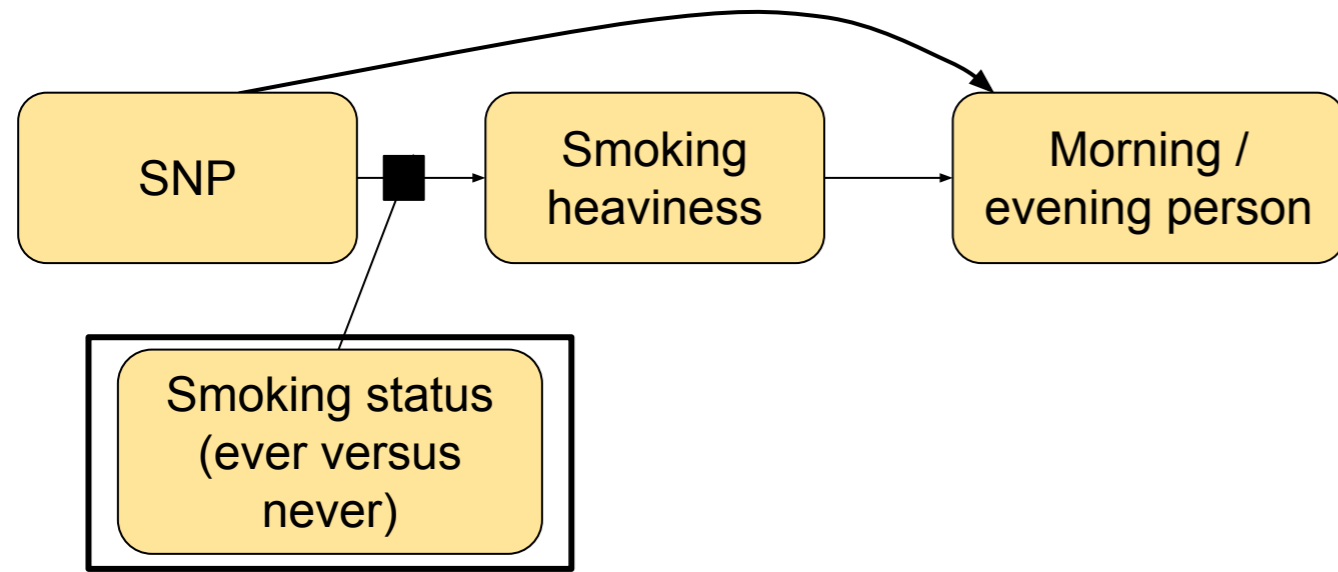

b) Independent effects of SNP and smoking status on outcome, not via smoking heaviness - consistent effects estimates in smoking status strata

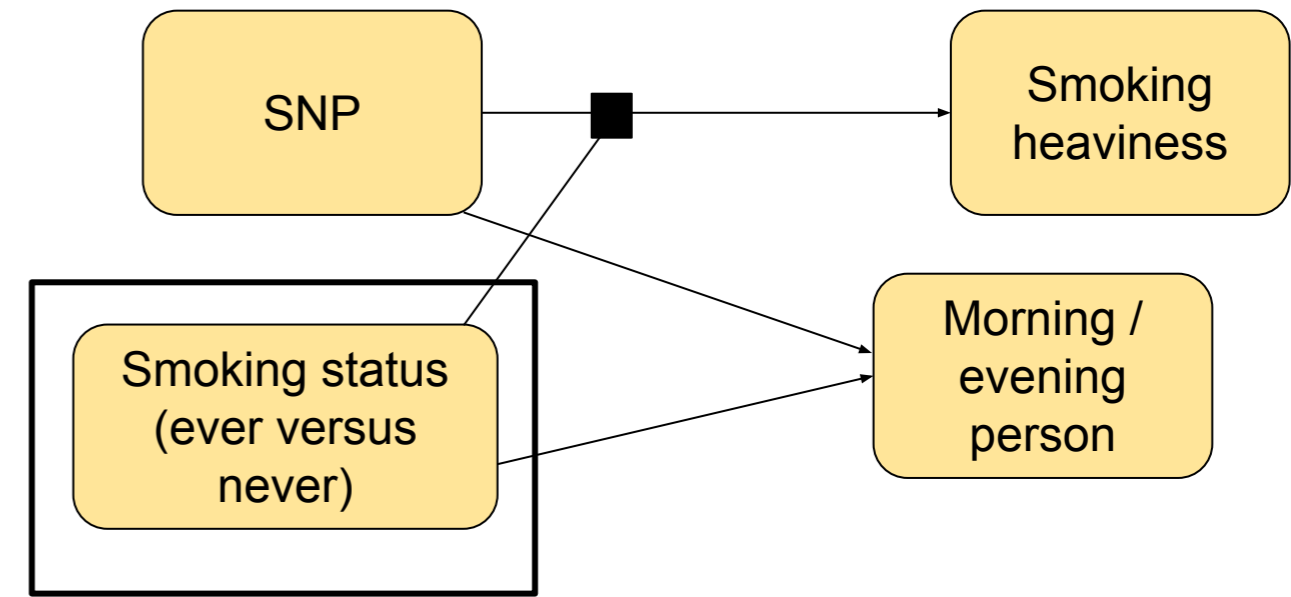

c) Effect of SNP on outcome via smoking status - no association of snp with outcome within smoking status strata

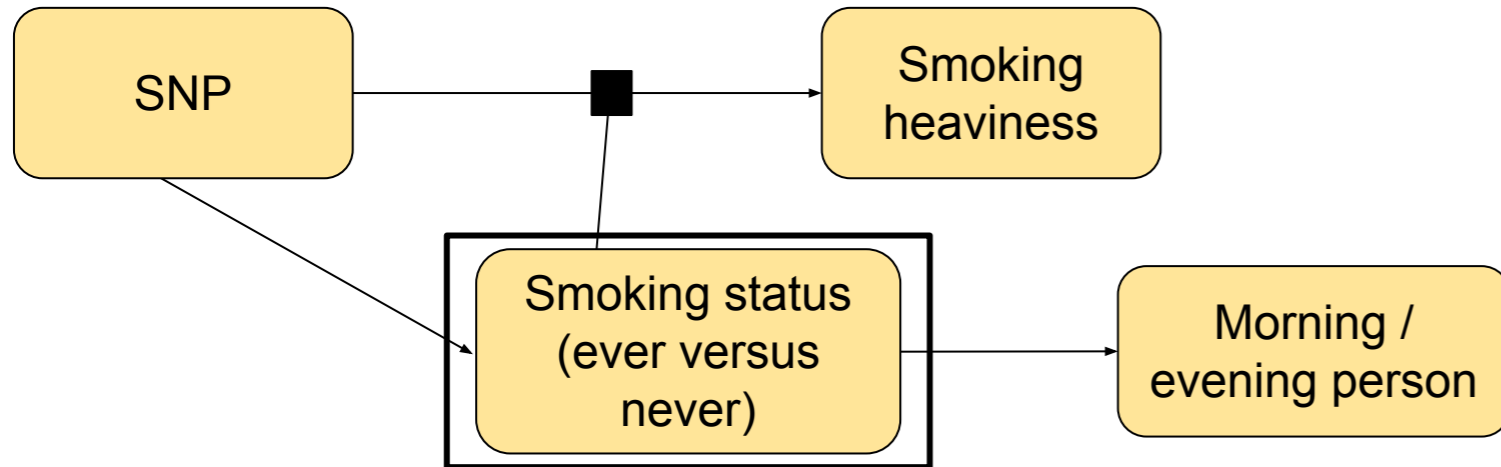

d) Interaction of smoking status on path between SNP and outcome gives an interaction between ever versus never smokers

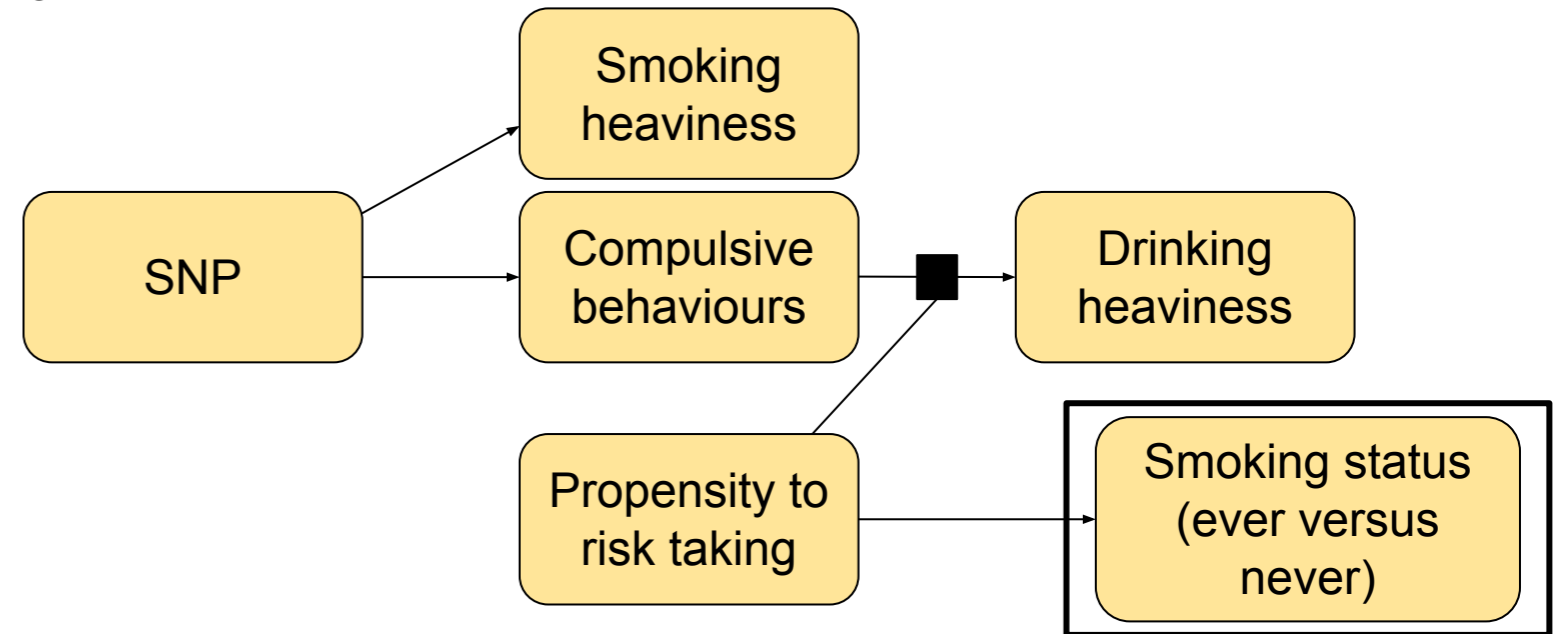

Supplement: pgen.1008353.s013.pdf [file pgen.1008353.s013.pdf]
